# Supplementary material for: Heartburn-Related Internet Searches and Trends of Interest across Six Western Countries: A Four-Year Retrospective Analysis Using Google Ads Keyword Planner
Source: MDPI journal article supplement (doi:10.3390/ijerph16234591), 2019-11-20
Supplement: s1 [file s1]

## Supplementary

**Table S1.** The top 20 keywords for each analyzed countries. Data presented as total number of queries of each keyword (percentage of total number of all keywords in the country).

| Top keyword | Australia                               | Canada                                  | Germany                                         | Poland                                            | The United Kingdom                           | The United States                         |
|-------------|-----------------------------------------|-----------------------------------------|-------------------------------------------------|---------------------------------------------------|----------------------------------------------|-------------------------------------------|
| 1.          | heartburn<br>2,194,500 (18.6%)          | acid reflux<br>2,640,000 (13.3%)        | sodbrennen<br>2,640,000 (8.9%)                  | reflaks<br>2,640,000 (13.8%)                      | heartburn<br>2,640,000 (8.0%)                | acid reflux<br>26,400,000 (13.5%)         |
| 2.          | reflux<br>511,500 (4.3%)                | gerd<br>2,640,000 (13.3%)               | reflux<br>2,640,000 (8.9%)                      | zgaga<br>2,491,500 (13.0%)                        | acid reflux<br>2,640,000 (8.0%)              | gerd<br>26,400,000 (13.5%)                |
| 3.          | acid reflux<br>363,000 (3.1%)           | heartburn<br>2,590,500 (13.0%)          | was hilft gegen sodbrennen<br>2,244,000 (7.5%)  | reflaks żołądka<br>759,000 (4.0%)                 | gerd<br>2,640,000 (8.0%)                     | heartburn<br>24,420,000 (12.5%)           |
| 4.          | heartburn symptoms<br>264,000 (2.2%)    | heartburn symptoms<br>264,000 (1.3%)    | hausmittel gegen sodbrennen<br>1,699,500 (5.7%) | reflaks żołądkowo<br>przelykowy<br>561,000 (2.9%) | reflux<br>2,541,000 (7.7%)                   | heartburn symptoms<br>2,640,000 (1.3%)    |
| 5.          | gerd<br>264,000 (2.2%)                  | reflux<br>264,000 (1.3%)                | sodbrennen schwangerschaft<br>1,254,000 (4.2%)  | reflaks objawy<br>363,000 (1.9%)                  | what causes<br>heartburn<br>2,244,000 (6.8%) | reflux<br>2,640,000 (1.3%)                |
| 6.          | what causes heartburn<br>264,000 (2.2%) | what causes heartburn<br>264,000 (1.3%) | refluxösophagitis<br>1,155,000 (3.9%)           | zgaga w ciąży<br>264,000 (1.4%)                   | silent reflux<br>858,000 (2.6%)              | what causes heartburn<br>2,640,000 (1.3%) |
| 7.          | heartburn remedies<br>264,000 (2.2%)    | heartburn remedies<br>264,000 (1.3%)    | sodbrennen was hilft<br>966,900 (3.2%)          | reflaks dieta<br>264,000 (1.4%)                   | acid reflux<br>symptoms<br>759,000 (2.3%)    | heartburn medicine<br>2,640,000 (1.3%)    |
| 8.          | gerd symptoms<br>264,000 (2.2%)         | acid reflux symptoms<br>264,000 (1.3%)  | sodbrennen hausmittel<br>957,000 (3.2%)         | co na za zgage<br>264,000 (1.4%)                  | gerd symptoms<br>561,000 (1.7%)              | heartburn remedies<br>2,640,000 (1.3%)    |
| 9.          | silent reflux<br>264,000 (2.2%)         | gerd diet<br>264,000 (1.3%)             | speiseröhrentzündung<br>610,500 (2.0%)          | Lek na zgage<br>264,000 (1.4%)                    | heartburn<br>symptoms<br>412,500 (1.2%)      | acid reflux symptoms<br>2,640,000 (1.3%)  |
| 10.         | reflux symptoms<br>264,000 (2.2%)       | gerd symptoms<br>264,000 (1.3%)         | refluxkrankheit<br>462,000 (1.5%)               | sposób na zgage<br>264,000 (1.4%)                 | heartburn remedies<br>363,000 (1.1%)         | acid reflux medicine<br>2,640,000 (1.3%)  |

|     |                                                      |                                                      |                                                        |                                              |                                                  |                                                        |
|-----|------------------------------------------------------|------------------------------------------------------|--------------------------------------------------------|----------------------------------------------|--------------------------------------------------|--------------------------------------------------------|
| 11. | heartburn pregnancy<br>264,000 (2.2%)                | heartburn home remedy<br>264,000 (1.3%)              | sodbrennen in der<br>schwangerschaft<br>462,000 (1.5%) | domowe sposoby na<br>zgagę<br>264,000 (1.4%) | how to get rid of<br>heartburn<br>313,500 (0.9%) | acid reflux diet<br>2,640,000 (1.3%)                   |
| 12. | how to get rid of<br>heartburn<br>264,000 (2.2%)     | what causes acid reflux<br>264,000 (1.3%)            | sodbrennen symptome<br>313,500 (1.0%)                  | sposoby na zgagę<br>259,050 (1.4%)           | what is heartburn<br>264,000 (0.8%)              | gerd diet<br>2,640,000 (1.3%)                          |
| 13. | acid reflux symptoms<br>259,050 (2.2%)               | gastroesophageal reflux<br>disease<br>264,000 (1.3%) | speiseröhre<br>313,500 (1.0%)                          | refluks u niemowlaka<br>259,050 (1.4%)       | acid reflux diet<br>264,000 (0.8%)               | gerd symptoms<br>2,640,000 (1.3%)                      |
| 14. | gastroesophageal reflux<br>disease<br>259,050 (2.2%) | how to get rid of<br>heartburn<br>264,000 (1.3%)     | reflux symptome<br>288,750 (1.0%)                      | co na zgagę w ciąży<br>254,100 (1.3%)        | gerd diet<br>264,000 (0.8%)                      | heartburn home remedy<br>2,640,000 (1.3%)              |
| 15. | what is heartburn<br>229,350 (1.9%)                  | what does heartburn feel<br>like<br>264,000 (1.3%)   | mittel gegen sodbrennen<br>264,000 (0.9%)              | dieta przy refluksie<br>249,150 (1.3%)       | acid reflux<br>treatment<br>264,000 (0.8%)       | what causes acid reflux<br>2,640,000 (1.3%)            |
| 16. | what is heartburn<br>229,350 (1.9%)                  | acid reflux diet<br>259,050 (1.3%)                   | gegen sodbrennen<br>264,000 (0.9%)                     | refluks u dzieci<br>234,300 (1.2%)           | heartburn home<br>remedy<br>264,000 (0.8%)       | gastroesophageal reflux<br>disease<br>2,640,000 (1.3%) |
| 17. | what is reflux<br>204,600 (1.7%)                     | home remedies for acid<br>reflux<br>259,050 (1.3%)   | hausmittel sodbrennen<br>264,000 (0.9%)                | zapalenie przełyku<br>234,300 (1.2%)         | constant heartburn<br>264,000 (0.8%)             | what is gerd<br>2,640,000 (1.3%)                       |
| 18. | heartburn home remedy<br>199,650 (1.7%)              | heartburn pregnancy<br>259,050 (1.3%)                | was hilft bei sodbrennen<br>264,000 (0.9%)             | objawy refluksu<br>229,350 (1.2%)            | what is acid reflux<br>264,000 (0.8%)            | home remedies for acid<br>reflux<br>2,640,000 (1.3%)   |
| 19. | what causes acid reflux<br>165,000 (1.4%)            | natural remedies for<br>heartburn<br>249,150 (1.3%)  | sodbrennen ursachen<br>264,000 (0.9%)                  | na zgagę<br>224,400 (1.2%)                   | heartburn cure<br>264,000 (0.8%)                 | how to get rid of<br>heartburn<br>2,640,000 (1.3%)     |
| 20. | reflux treatment<br>120,450 (1.0%)                   | what is heartburn<br>244,200 (1.2%)                  | was tun bei sodbrennen<br>264,000 (0.9%)               | zgaga obawy<br>214,500 (1.1%)                | what causes acid<br>reflux<br>264,000 (0.8%)     | what does heartburn feel<br>like<br>2,640,000 (1.3%)   |

**Table S2.** Comparison between the number of searches per month in the Google search engine of categories of keywords associated with heartburn in the analyzed countries in each season (1a) and each year (1b). Data are presented as median (interquartile range).

A) Category of keyword: Treatment.

| Country        | Spring (Sp)                  | Summer (Su)                  | Fall (F)                     | Winter (W)                     | Differences between Seasons | Post Hoc Test                                                                                                       |
|----------------|------------------------------|------------------------------|------------------------------|--------------------------------|-----------------------------|---------------------------------------------------------------------------------------------------------------------|
| Australia      | 56,838<br>(52,655–66,953)    | 57,258<br>(47,959–60,134)    | 51,023<br>(41,745–53,599)    | 56,860<br>(46,783–61,489)      | H(3) = 6.73; $p = 0.08$     | -                                                                                                                   |
| Canada         | 97,933<br>(88,119–100,580)   | 79,540<br>(72,583–87,015)    | 87,535<br>(76,213–98,775)    | 92,435<br>(88,300–99,704)      | H(3) = 12.09; $p < 0.01$    | Su vs. W: $p = 0.007$                                                                                               |
| Germany        | 255,805<br>(226,010–298,675) | 190,113<br>(180,976–213,110) | 258,840<br>(234,233–314,674) | 283,130<br>(260,119–333,581)   | H(3) = 19.11; $p < 0.001$   | Sp vs. Su: $p < 0.01$ ; Su vs. F: $p = 0.004$ ; Su vs. W: $p < 0.001$                                               |
| Poland         | 99,715<br>(90,533–117,684)   | 81,820<br>(69,785–88,553)    | 101,053<br>(90,823–113,710)  | 118,873<br>(112,256–128,053)   | H(3) = 21.76 ; $p < 0.001$  | Sp vs. Su: $p = 0.009$ ; Sp vs. W: $p = 0.03$ ; Su vs. F: $p = 0.009$ ; Su vs. W: $p < 0.001$ ; A vs. W: $p = 0.03$ |
| United Kingdom | 140,608<br>(138,900–143,379) | 121,030<br>(93,853–132,338)  | 136,723<br>(105,770–141,623) | 142,835<br>(128,020–149,459)   | H(3) = 12.80; $p < 0.01$    | Sp vs. Su: $p = 0.009$ ; Su vs. W: $p = 0.02$                                                                       |
| United States  | 952,813<br>(898,190–980,445) | 876,163<br>(799,720–943,704) | 849,210<br>(785,243–984,876) | 952,565<br>(884,305–1,051,256) | H(3) = 6.41; $p = 0.09$     | -                                                                                                                   |

| Categories of Keywords | 1st year                     | 2nd year                     | 3rd year                     | 4th year                         | Differences between Seasons | Post Hoc Test                                                                                                                                         |
|------------------------|------------------------------|------------------------------|------------------------------|----------------------------------|-----------------------------|-------------------------------------------------------------------------------------------------------------------------------------------------------|
| Australia              | 42,183<br>(40,031–51,455)    | 51,513<br>(44,508–55,759)    | 55,575<br>(52,419–60,005)    | 63,793<br>(59,525–67,174)        | $H(3) = 24.35; p < 0.001$   | 1st vs. 3rd: $p < 0.006$ ;<br>1st vs. 4th: $p < 0.001$ ;<br>2nd vs. 4th: $p < 0.001$ ;<br>3rd: 4th: $p = 0.02$                                        |
| Canada                 | 76,298<br>(72,446–85,629)    | 88,078<br>(80,011–93,018)    | 92,783<br>(88,428–98,095)    | 103,158<br>(97,240–108,195)      | $H(3) = 26.30; p < 0.001$   | 1st vs. 2nd: $p = 0.03$ ;<br>1st vs. 3rd: $p < 0.001$ ;<br>1st vs. 4th: $p < 0.001$ ;<br>2nd vs. 4th: $p = 0.001$ ;<br>3rd vs. 4th: $p = 0.02$        |
| Germany                | 237,413<br>(215,499–250,976) | 235,035<br>(208,398–265,348) | 274,220<br>(245,446–296,864) | 324,783<br>(217,220–335,020)     | $H(3) = 7.63; p = 0.05$     | -                                                                                                                                                     |
| Poland                 | 83,645<br>(70,858–98,720)    | 97 538<br>(84 999–104 951)   | 108 328<br>(90 533–121 520)  | 122 433<br>(109 848.8–133 424)   | $H(3)=16.61; p < 0.001$     | 1 <sup>st</sup> vs. 3 <sup>rd</sup> : $P=.02$ ; 1 <sup>st</sup> vs.<br>4 <sup>th</sup> : $P=.002$ ;<br>2 <sup>nd</sup> vs. 4 <sup>th</sup> : $P=.009$ |
| United Kingdom         | 101 203<br>(96 824–114 879)  | 134,298<br>(116,563–140,484) | 140,680<br>(138,281–142,525) | 143,083<br>(140,174–144,481)     | $H(3) = 2.04; p < 0.001$    | 1st vs. 2nd: $p = 0.04$ ;<br>1st vs. 3rd: $p < 0.001$ ;<br>1st vs. 4th: $p < 0.001$ ;<br>2nd vs. 4th: $p = 0.02$                                      |
| United States          | 814,138<br>(788,026–871,758) | 852,650<br>(831,514–944,373) | 946,328<br>(908,931–966,240) | 1,022,335<br>(978,106–1,069,459) | $H(3) = 28.00; p < 0.001$   | 1st vs. 3rd: $p = 0.001$ ;<br>1st vs. 4th: $p < 0.001$ ;<br>2nd vs. 4th: $p < 0.001$ ;<br>3rd vs. 4th: $p < 0.001$                                    |

B) Category of keyword: Home-based treatment.

| Country        | Spring (Sp)                  | Summer (Su)                  | Fall (F)                     | Winter (W)                   | Differences between seasons | Post hoc test                                                                                                           |
|----------------|------------------------------|------------------------------|------------------------------|------------------------------|-----------------------------|-------------------------------------------------------------------------------------------------------------------------|
| Australia      | 7425<br>(7301–7920)          | 6930<br>(5198–7425)          | 2228<br>(1856–7425)          | 7425<br>(5816–7536)          | $H(3) = 6.39; p = 0.09$     | -                                                                                                                       |
| Canada         | 12,623<br>(12,375–12,870)    | 12,375<br>(12,375–12,499)    | 12,623<br>(12,375–12,870)    | 12,623<br>(12 375–12,870)    | $H(3) = 3.56; p = 0.31$     | -                                                                                                                       |
| Germany        | 86,418<br>(70,390–130,370)   | 32,758<br>(31,173–79,459)    | 88,818<br>(69,238–104,794)   | 91,763<br>(82,828–108,854)   | $H(3) = 13.17; p < 0.01$    | Sp vs. Su: $p = 0.01$ ; Su vs. F: $p = 0.03$ ;<br>Su vs. W: $p = 0.004$                                                 |
| Poland         | 22,418<br>(16,923–25,301)    | 15,933<br>(12,344–18,210)    | 23,160<br>(17,120–25,759)    | 26,403<br>(25,474–27,133)    | $H(3) = 23.53; p < 0.001$   | Sp vs. Su: $p = 0.01$ ; Sp vs. W: $p = 0.01$ ;<br>Su vs. F: $p = 0.01$ ; Su vs. W: $p < 0.001$ ;<br>F vs. W: $p = 0.01$ |
| United Kingdom | 12,870<br>(12,375–12,870)    | 7178<br>(6930–12,870)        | 12,870<br>(7301–12,870)      | 12,623<br>(11,261–13,365)    | $H(3) = 7.91; p = 0.048$    | Sp vs. Su: $p = 0.048$ ;<br>Su vs. W: $p = 0.048$                                                                       |
| United States  | 128,700<br>(123,750–128,700) | 126,225<br>(123,750–128,700) | 128,700<br>(128,700–128,700) | 128,700<br>(123,750–141,075) | $H(3) = 3.10; p = 0.38$     | -                                                                                                                       |

| Categories of Keywords | 1st year                     | 2nd year                     | 3rd year                     | 4th year                     | Differences between Seasons | Post Hoc Test                                                                                                                              |
|------------------------|------------------------------|------------------------------|------------------------------|------------------------------|-----------------------------|--------------------------------------------------------------------------------------------------------------------------------------------|
| Australia              | 1485<br>(1485–6435)          | 6683<br>(2351–7425)          | 7648<br>(7425–7920)          | 7425<br>(7425–7920)          | $H(3) = 29.41; p < 0.001$   | 1st vs. 2nd: $p = 0.006$ ; 1st vs. 3rd: $p < 0.001$ ;<br>1st vs. 4th: $p < 0.001$ ; 2nd vs 3rd: $p = 0.005$ ;<br>2nd vs. 4th: $p = 0.006$  |
| Canada                 | 12,375<br>(12,251–12,375)    | 12,375<br>(12,375–12,375)    | 12,870<br>(12,746–12 870)    | 12,870<br>(12,870–12,870)    | $H(3) = 36.82; p = 0.001$   | 1st vs. 3rd: $p < 0.001$ ; 1st vs. 4th: $p < 0.001$ ;<br>2nd vs. 4th: $p < 0.001$ ; 3rd vs. 4th: $p < 0.001$                               |
| Germany                | 81,118<br>(35,800–96,511)    | 60,800<br>(37 126–95 116)    | 90,873<br>(81 516–131 065)   | 90,080<br>(37,275–97,259)    | $H(3) = 3.08; p = 0.38$     | -                                                                                                                                          |
| Poland                 | 17,145<br>(15,301–24,249)    | 20,958<br>(16,403–24,769)    | 25,115<br>(17,690–27,170)    | 25,635<br>(20,933–26,625)    | $H(3) = 8.78; p = 0.03$     | -                                                                                                                                          |
| United Kingdom         | 7178<br>(6930–7920)          | 12,375<br>(7301–12,499)      | 12,870<br>(12,870–13,365)    | 12,870<br>(12,870–13,489)    | $H(3) = 29.10; p < 0.001$   | 1st vs. 2nd: $p = 0.03$ ; 1st vs. 3rd: $p < 0.001$ ;<br>1st vs. 4th: $p < 0.001$ ; 2nd: 3rd: $p < 0.01$ ;<br>2nd vs. 4th: $p < 0.01$       |
| United States          | 126,225<br>(123,750–128,700) | 123,750<br>(123,750–123,750) | 128,700<br>(128,700–128,700) | 128,700<br>(128,700–178,200) | $H(3) = 25.06; p < 0.001$   | 1st vs. 3rd: $p = 0.040$ ; 1st vs. 4th: $p = 0.003$ ;<br>2nd vs. 3rd: $p = 0.003$ ; 2nd vs. 4th: $p < 0.001$ ;<br>3rd vs. 4th: $p = 0.040$ |

C) Category of keyword: Herbal remedies.

| Country                | Spring (Sp)                 | Summer (Su)               | Fall (F)                    | Winter (W)                  | Differences between seasons | Post hoc test                                                                                  |
|------------------------|-----------------------------|---------------------------|-----------------------------|-----------------------------|-----------------------------|------------------------------------------------------------------------------------------------|
| Australia              | 6385<br>(3465–8860)         | 3465<br>(3291–7883)       | 3390<br>(2920–3465)         | 3365<br>(2759–4850)         | H(3) = 12.00; $p < 0.01$    | Sp vs. Su: $P = 0.01$ ; Sp vs. W: $P = 0.03$ ;                                                 |
| Canada                 | 9900<br>(9776–9900)         | 9158<br>(8736–9405)       | 9405<br>(9405–9900)         | 9900<br>(9776–9900)         | H(3) = 17.63; $p < 0.001$   | Sp vs. Su: $p = 0.004$ ; Su vs. W: $p < 0.004$                                                 |
| Germany                | 6710<br>(5991–7155)         | 5620<br>(5125–6040)       | 6090<br>(5620–7650)         | 7155<br>(6635–7700)         | H(3) = 13.44; $p < 0.01$    | Sp vs. Su: $p = 0.04$ ; Su vs. W: $p = 0.004$                                                  |
| Poland                 | 4543<br>(4283–5185)         | 3800<br>(3700–4295)       | 4295<br>(4170–4456)         | 4840<br>(4740–5866)         | H(3) = 21.26; $p < 0.001$   | Sp vs. Su: $p = 0.005$ ; Su vs. F: $p = 0.02$ ;<br>Su vs. W: $p < 0.001$ ; F vs. W: $p = 0.02$ |
| United Kingdom         | 15,345<br>(14,850–15,469)   | 14,330<br>(9900–14,850)   | 15,320<br>(9405–15,456)     | 15,345<br>(14,800–15,456)   | H(3) = 6.29; $p = 0.10$     | -                                                                                              |
| United States          | 147,510<br>(98,010–147,510) | 93 060<br>(88 110–98 134) | 95,535<br>(76,973–98,134)   | 122,760<br>(96,773–152,460) | H(3) = 10.97; $p = 0.01$    | -                                                                                              |
| Categories of Keywords | 1st year                    | 2nd year                  | 3rd year                    | 4th year                    | Differences between seasons | Post hoc test                                                                                  |
| Australia              | 3143<br>(2475–3564)         | 3415<br>(2920–4938)       | 3885<br>(3415–8315)         | 3465<br>(3403–5309)         | H(3) = 3.77; $p = 0.29$     | -                                                                                              |
| Canada                 | 9405<br>(9269–9529)         | 9900<br>(9393–9900)       | 9405<br>(9405–9900)         | 9900<br>(9405–9900)         | H(3) = 4.96; $p = 0.17$     | -                                                                                              |
| Germany                | 5670<br>(5100–6078)         | 6413<br>(6090–7291)       | 6140<br>(5 608–7 241)       | 7180<br>(6574–7316)         | H(3) = 11.64; $p < 0.01$    | 1st vs. 2nd: $p = 0.03$ ; 1st vs. 4th: $p = 0.0095$                                            |
| Poland                 | 4095<br>(3738–4295)         | 4568<br>(4146–4840)       | 4295<br>(4283–4753)         | 5433<br>(4295–5941)         | H(3) = 11.96; $p < 0.01$    | 1st vs. 4th: $p = 0.01$                                                                        |
| United Kingdom         | 9628<br>(9393–14,850)       | 15,098<br>(13,241–15,345) | 15,320<br>(14,850–15,803)   | 15,345<br>(15,184–15,456)   | H(3) = 13.93; $p < 0.01$    | 1st vs. 2nd: $p = 0.04$ ; 1st vs. 3rd: $p = 0.008$ ;<br>1st vs. 4th: $p = 0.008$               |
| United States          | 95,535<br>(88,110–147,510)  | 93,060<br>(78,210–98,134) | 145,035<br>(98,010–148,748) | 98,010<br>(96,773–110,756)  | H(3) = 5.35; $p = 0.15$     | -                                                                                              |

## D) Category of keyword: Diet.

| Country        | Spring (Sp)                  | Summer (Su)                  | Fall (F)                     | Winter (W)                   | Differences between seasons | Post hoc test                                                        |
|----------------|------------------------------|------------------------------|------------------------------|------------------------------|-----------------------------|----------------------------------------------------------------------|
| Australia      | 13,310<br>(10,290–16,329)    | 10,588<br>(9,919–15,846)     | 10,538<br>(9,411–11,293)     | 10,563<br>(10,328–11,293)    | $H(3) = 2.68; p = 0.44$     | -                                                                    |
| Canada         | 30,635<br>(25,561–32,355)    | 23,705<br>(21,478–25,314)    | 29,125<br>(24,324–30,128)    | 31,130<br>(26,353–3,231)     | $H(3) = 13.56; p < 0.01$    | Sp vs. Su: $p = 0.008$ ; Su vs. W: $p = 0.008$                       |
| Germany        | 67,075<br>(50,978–73,588)    | 48 065<br>(36,379–52,005)    | 61,533<br>(47,244–71,991)    | 69,728<br>(64,404–90,951)    | $H(3) = 15.68; p < 0.01$    | Sp vs. Su: $p = 0.02$ ; Su vs. F: $p = 0.04$ ; Su vs. W: $p = 0.001$ |
| Poland         | 44,110<br>(41,590–46,015)    | 33,663<br>(29,421–40,705)    | 43,293<br>(37,418–46,389)    | 46,853<br>(44,520–56,374)    | $H(3) = 19.23; p < 0.001$   | Sp vs. Su: $p = 0.001$ ; Su vs. W: $p < 0.001$                       |
| United Kingdom | 38,308<br>(35,585–43,629)    | 30,883<br>(29,645–35,956)    | 35,065<br>(30,635–37,813)    | 38,555<br>(35,833–39,669)    | $H(3) = 12.55; p < 0.01$    | Sp vs. Su: $p = 0.02$ ; Su vs. W: $p = 0.02$                         |
| United States  | 281,600<br>(247,321–313,775) | 246,208<br>(237,298–294,594) | 243,733<br>(237,050–305,236) | 307,588<br>(285,684–319,715) | $H(3) = 7.97; p = 0.046$    | -                                                                    |



| Categories of Keywords | 1st year                     | 2nd year                     | 3rd year                     | 4th year                     | Differences between seasons | Post hoc test                                                                                                                             |
|------------------------|------------------------------|------------------------------|------------------------------|------------------------------|-----------------------------|-------------------------------------------------------------------------------------------------------------------------------------------|
| Australia              | 8805<br>(7666–9350)          | 10,340<br>(10,290–10,959)    | 11,230<br>(10,340–15,748)    | 16,205<br>(14,571–16,366)    | $H(3) = 31.62; p < 0.001$   | 1st vs. 2nd: $p < 0.001$ ; 1st vs. 3rd: $p < 0.001$ ;<br>1st vs. 4th: $p < 0.001$ ; 2nd vs. 4th: $p = 0.001$ ;<br>3rd vs. 4th: $p = 0.02$ |
| Canada                 | 23,210<br>(20,735–25,685)    | 28,655<br>(24,571–30,103)    | 29,645<br>(26,105–30,883)    | 32,813<br>(30,103–33,221)    | $H(3) = 19.16; p < 0.001$   | 1st vs. 2nd: $p = 0.03$ ; 1st vs. 3rd: $p = 0.008$ ;<br>1st vs. 4th: $p = 0.003$ ; 2nd vs. 4th: $p < 0.02$ ;<br>3rd vs. 4th: $p = 0.03$   |
| Germany                | 45,840<br>(41,168–53,249)    | 61,433<br>(48,436–66,943)    | 62,400<br>(50,768–70,295)    | 93,958<br>(70,494–95,505)    | $H(3) = 19.61; p < 0.001$   | 1st vs. 2nd: $p = 0.03$ ; 1st vs. 3rd: $p = 0.03$ ;<br>1st vs. 4th: $p < 0.001$ ; 2nd vs. 4th: $p = 0.009$ ;<br>3rd vs. 4th: $p = 0.01$   |
| Poland                 | 39,473<br>(29,421–41,170)    | 42,055<br>(33,648–44,000)    | 45,620<br>(41,809–47,106)    | 47,773<br>(44,814–56,225)    | $H(3) = 19.09; p < 0.001$   | 1st vs. 3rd: $p = 0.01$ ; 1st vs. 4th: $p < 0.001$ ;<br>2nd vs. 4th: $p = 0.004$                                                          |
| United Kingdom         | 30,635<br>(29,893–30,635)    | 34,843<br>(30,635–37,936)    | 37,813<br>(37,441–38,803)    | 38,555<br>(37,404–44,111)    | $H(3) = 24.79; p < 0.001$   | 1st vs. 2nd: $p = 0.02$ ; 1st vs. 3rd: $p < 0.001$ ;<br>1st vs. 4th: $p < 0.001$                                                          |
| United States          | 238,783<br>(229,130–245,218) | 243,980<br>(243,361–295,831) | 297,935<br>(252,148–312,290) | 320,458<br>(317,240–327,140) | $H(3) = 27.72; p < 0.001$   | 1st vs. 3rd: $p = 0.004$ ; 1st vs. 4th: $p < 0.001$ ;<br>2nd vs. 4th: $p < 0.001$ ; 3rd vs. 4th: $p = 0.004$                              |

E) Category of keyword: What is heartburn?

| Country        | Spring (Sp)                  | Summer (Su)                  | Fall (F)                     | Winter (W)                   | Differences between seasons | Post hoc test                                                               |
|----------------|------------------------------|------------------------------|------------------------------|------------------------------|-----------------------------|-----------------------------------------------------------------------------|
| Australia      | 15,865<br>(15,703–17,461)    | 15,765<br>(15,308–16,285)    | 15,515<br>(14,081–15,915)    | 10,593<br>(5 579–15 331)     | $H(3) = 12.05; p < 0.01$    | Sp vs. W: $p = 0.01$                                                        |
| Canada         | 21,930<br>(16,955–22 129)    | 14,158<br>(9764–18,193)      | 21,558<br>(17,043–21,968)    | 21,930<br>(17,501–22,216)    | $H(3) = 12.81; p < 0.01$    | Sp vs. Su: $p = 0.01$ ; Su vs. F: $p = 0.040$ ;<br>Su vs. W: $p \leq 0.009$ |
| Germany        | 8870<br>(8475–8970)          | 8500<br>(7880–8983)          | 8920<br>(8475–8970)          | 9020<br>(8821–9478)          | $H(3) = 7.67; p = 0.05$     | -                                                                           |
| Poland         | 5418<br>(5133–10,244)        | 4378<br>(3956–5281)          | 4898<br>(4080–7150)          | 5170<br>(4650–10120)         | $H(3) = 5.58; p = 0.13$     | -                                                                           |
| United Kingdom | 28,715<br>(28,565–29,135)    | 27,895<br>(27,563–28,169)    | 28,640<br>(28,245–29,135)    | 28,615<br>(28,578–29,309)    | $H(3) = 13.60; p < 0.01$    | Sp vs. Su: $p = 0.008$ ; Su vs. F: $p = 0.02$ ;<br>Su vs. W: $p = 0.008$    |
| United States  | 201,003<br>(198,676–203,886) | 196,745<br>(183,751–198,813) | 199,023<br>(197,624–202,203) | 200,483<br>(197,760–203,478) | $H(3) = 9.77; p = 0.02$     | Sp vs. Su: $p = 0.03$                                                       |

| Categories of Keywords | 1st year                     | 2nd year                     | 3rd year                     | 4th year                     | Differences between seasons | Post Hoc Test                                                                                                                              |
|------------------------|------------------------------|------------------------------|------------------------------|------------------------------|-----------------------------|--------------------------------------------------------------------------------------------------------------------------------------------|
| Australia              | 10,765<br>(5753–15,840)      | 15,640<br>(10,779–15,878)    | 15,640<br>(15,283–15,953)    | 16,013<br>(15,354–20,690)    | $H(3) = 7.33; p = 0.06$     | -                                                                                                                                          |
| Canada                 | 16,705<br>(10,148–17,018)    | 19,380<br>(14,651–22,325)    | 21,905<br>(20,221–22,005)    | 21,930<br>(21,793–22,204)    | $H(3) = 17.37; p < 0.001$   | 1st vs. 3rd: $p = 0.003$ ; 1st vs. 4th: $p < 0.001$                                                                                        |
| Germany                | 8475<br>(7980–8475)          | 8525<br>(8326–9020)          | 8970<br>(8920–9131)          | 8945<br>(8870–9131)          | $H(3) = 20.94; p < 0.001$   | 1st vs. 3rd: $p < 0.001$ ; 1st vs. 4th: $p < 0.001$                                                                                        |
| Poland                 | 4080<br>(3956–4279)          | 4650<br>(4080–4799)          | 5665<br>(5170–10,120)        | 10,368<br>(6024–10,615)      | $H(3) = 32.68; p < 0.001$   | 1st vs. 2nd: $p = 0.047$ ; 1st vs. 3rd: $p < 0.001$ ;<br>1st vs. 4th: $p < 0.001$ ; 2nd vs. 3rd: $p = 0.001$ ;<br>2nd vs. 4th: $p < 0.001$ |
| United Kingdom         | 28,268<br>(27,859–28,590)    | 28,765<br>(28,416–29,346)    | 28,590<br>(28,429–29,160)    | 28,615<br>(28,095–29,296)    | $H(3) = 6.86; p = 0.08$     | -                                                                                                                                          |
| United States          | 201,473<br>(146,131–202,488) | 197,760<br>(197,290–201,844) | 197,760<br>(197,154–198,825) | 203,750<br>(199,641–207,981) | $H(3) = 12.58; p < 0.01$    | 2nd vs. 4th: $p = 0.005$ ; 3rd vs. 4th: $p = 0.005$                                                                                        |

F) Category of keyword: Causes.

| Country                | Spring (Sp)                  | Summer (Su)                  | Fall (F)                     | Winter (W)                   | Differences between seasons | Post hoc test                                                                                               |
|------------------------|------------------------------|------------------------------|------------------------------|------------------------------|-----------------------------|-------------------------------------------------------------------------------------------------------------|
| Australia              | 20,715<br>(20,641–21,820)    | 20,790<br>(16,398–22 329)    | 19,100<br>(15,903–20,726)    | 20,315<br>(15,554–20,924)    | H(3) = 6.55; $p = 0.09$     | -                                                                                                           |
| Canada                 | 21,265<br>(20,979–22,221)    | 20,395<br>(19,643–20,816)    | 20,818<br>(20,175–21,440)    | 21,365<br>(21,145–21,651)    | H(3) = 14.78; $p < 0.01$    | Sp vs. Su: $p = 0.006$ ; Su vs. W: $p = 0.006$                                                              |
| Germany                | 26,048<br>(25,069–27,521)    | 18,450<br>(17,918–19,315)    | 25,875<br>(23,906–27,089)    | 26,815<br>(26,259–28,041)    | H(3) = 26.31; $p < 0.001$   | Sp vs. Su: $p < 0.001$ ; Su vs. F: $p < 0.001$ ;<br>Su vs. W: $p < 0.001$                                   |
| Poland                 | 15,385<br>(14,071–20,223)    | 10,633<br>(9653–14,964)      | 15,285<br>(13,353–15,634)    | 20,335<br>(15,719–20,916)    | H(3) = 17.13; $p < 0.001$   | Sp vs. Su: $p = 0.02$ ; Su vs. F: $p = 0.03$ ;<br>Su vs. W: $p < 0.001$ ; F vs. W: $p = 0.045$              |
| United Kingdom         | 77,085<br>(76,005–82,196)    | 74,708<br>(26,343–75,450)    | 76,193<br>(76,083–76,515)    | 77,108<br>(76,960–77,580)    | H(3) = 21.84; $p < 0.001$   | Sp vs. Su: $p = 0.006$ ; Su vs. F: $p = 0.006$ ;<br>Su vs. W: $p < 0.001$ ; F vs. W: $p = 0.006$            |
| United States          | 171,610<br>(170,051–181,263) | 170,150<br>(167,600–172,105) | 170,695<br>(170,496–176,609) | 171,585<br>(171,041–177,290) | H(3) = 5.34; $p = 0.15$     | -                                                                                                           |
| Categories of Keywords | 1st year                     | 2nd year                     | 3rd year                     | 4th year                     | Differences between seasons | Post hoc test                                                                                               |
| Australia              | 19,620<br>(15,575–20 454)    | 16,163<br>(15 391–20 590)    | 20,715<br>(20,565–20,839)    | 22,205<br>(21,743–22,513)    | H(3)=20.48; $p < 0.001$     | 1st vs. 4th: $p = 0.002$ ; 2nd vs. 3rd: $p = .02$ ;<br>2nd vs. 4th: $p = 0.002$ ; 3rd vs. 4th: $P = .002$   |
| Canada                 | 20,078<br>(19,643–20,438)    | 21,115<br>(20,276–21,278)    | 21,340<br>(21,078–21,760)    | 21,490<br>(21,115–21,985)    | H(3)=21.50; $p < 0.001$     | 1st vs. 2nd: $P = 0.03$ ; 1st vs. 3rd: $p < 0.001$ ;<br>1st vs. 4th: $P < 0.001$ ; 2nd vs. 4th: $p = 0.049$ |
| Germany                | 24,588<br>(21,554–25,591)    | 25,578<br>(20,468–26,531)    | 25,750<br>(23,648–27,076)    | 27,658<br>(25,343–28,499)    | H(3)=8.80; $p = 0.03$       | 1st vs. 4th: $p = 0.049$                                                                                    |
| Poland                 | 11,228<br>(9578–16,460)      | 15,385<br>(14,828–15,893)    | 15,310<br>(10,669–20,793)    | 15,658<br>(15,185–20,384)    | H(3)=5.21; $p = 0.16$       | -                                                                                                           |
| United Kingdom         | 76,093<br>(63,211–76,985)    | 75,848<br>(74,830–76,739)    | 76,290<br>(75,859–76,998)    | 77,258 (76,218–82,629)       | H(3)=5.32; $p = 0.15$       | -                                                                                                           |
| United States          | 167,625                      | 170,670                      | 171,140                      | 180,768                      | H(3)=22.65; $p < 0.001$     | 1st vs. 3rd: $p = 0.02$ ; 1st vs. 4th: $p < 0.001$ ;                                                        |

|                   |                   |                   |                   |                                                  |
|-------------------|-------------------|-------------------|-------------------|--------------------------------------------------|
| (161,424-171,523) | (170,163-170,831) | (170,163-176,609) | (176,808-182,599) | 2nd vs. 4th: $p < 0.001$ ; 3rd vs. 4th: $p=0.02$ |
|-------------------|-------------------|-------------------|-------------------|--------------------------------------------------|

G) Category of keyword: Symptoms

| Country        | Spring (Sp)                  | Summer (Su)                  | Fall (F)                     | Winter (W)                   | Differences between seasons | Post hoc test                             |
|----------------|------------------------------|------------------------------|------------------------------|------------------------------|-----------------------------|-------------------------------------------|
| Australia      | 34,000<br>(30,519-36,274)    | 30,410<br>(30,011-31,881)    | 30,358<br>(30,186-32,080)    | 31,128<br>(30,224-34,801)    | H(3)=6.38; $p=0.09$         | -                                         |
| Canada         | 32,810<br>(32,270-33,555)    | 31,673<br>(31,164-32,008)    | 32,810<br>(31,798-33,146)    | 32,763<br>(32,158-33,430)    | H(3)=9.53; $p=0.02$         | Sp vs. Su: $p=0.040$ ; Su vs. W: $p=0.03$ |
| Germany        | 14,330<br>(13,810-14,850)    | 13,860<br>(13,760-14,268)    | 14,305<br>(13,798-14,850)    | 14,305<br>(14,305-14,603)    | H(3)=7.29; $p=0.06$         | -                                         |
| Poland         | 33,315<br>(24,183-38,548)    | 26,260<br>(20,864-31,606)    | 30,345<br>(28,686-32,408)    | 34,058<br>(32,545-36,236)    | H(3)=10.99; $p=0.01$        | Su vs. W: $p=0.01$                        |
| United Kingdom | 70,140<br>(44,796-95,633)    | 44,993<br>(44,584-45,535)    | 68,135<br>(45,714-94,618)    | 45,688<br>(45,415-58,285)    | H(3)=5.79; $p=0.12$         | -                                         |
| United States  | 295,393<br>(290,283-300,554) | 290,740<br>(284,589-293,895) | 292,125<br>(280,519-299,823) | 300,145<br>(294,131-306,196) | H(3)=10.91; $p=0.01$        | Su vs. W: $p=0.03$                        |

| Categories of Keywords | 1st year                     | 2nd year                     | 3rd year                     | 4th year                     | Differences between seasons | Post hoc test                                                                                                      |
|------------------------|------------------------------|------------------------------|------------------------------|------------------------------|-----------------------------|--------------------------------------------------------------------------------------------------------------------|
| Australia              | 29,840<br>(29,220-30,298)    | 30,383<br>(30,173-30,696)    | 30,805<br>(30,519-31,783)    | 35,728<br>(35,643-36,124)    | $H(3) = 27.34; p < 0.001$   | 1st vs. 3rd: $p = 0.003$ ;<br>1st vs. 4th: $p < 0.001$ ;<br>2nd vs. 4th: $p < 0.001$ ;<br>3rd vs. 4th: $p < 0.001$ |
| Canada                 | 31,130<br>(30,856-32,045)    | 32,020<br>(31,689-32 875)    | 33,355<br>(32,998-33,505)    | 32,860<br>(32,365-32,960)    | $H(3) = 19.27; p < 0.001$   | 1st vs. 3rd: $p = 0.001$ ;<br>1st vs. 4th: $p = 0.001$                                                             |
| Germany                | 14,255<br>(13,798-14,268)    | 14,058<br>(9900-14,318)      | 14,305<br>(14,156-14,454)    | 15 098<br>(14,701-15,444)    | $H(3) = 14.09; p < 0.01$    | 1st vs. 4th: $p = 0.01$ ;<br>2nd vs. 4th: $p = 0.01$ ;<br>3rd vs. 4th: $p = 0.04$                                  |
| Poland                 | 30,935<br>(22,793-33,053)    | 28,340<br>(23,699-31,866)    | 32,078<br>(28,873-34,219)    | 34,330<br>(31,694-43,068)    | $H(3) = 9.50; p = 0.02$     | 2nd vs. 4th: $p = 0.04$                                                                                            |
| United Kingdom         | 93,678<br>(45,391-94,149)    | 45,243<br>(43,658-46,134)    | 45,365<br>(44,721-56,836)    | 93,133<br>(45,474-95,595)    | $H(3) = 8.85; p = 0.03$     | -                                                                                                                  |
| United States          | 283,860<br>(278,378-288,971) | 292,275<br>(289,936-301,433) | 299,873<br>(294,501-302,484) | 295,145<br>(292,794-295,986) | $H(3) = 10.77; p = 0.01$    | 1st vs. 3rd: $p = 0.03$                                                                                            |

## H) Category of keyword: Pregnant

| Country        | Spring (Sp)                   | Summer (Su)                  | Fall (F)                     | Winter (W)                   | Differences between seasons | Post hoc test                                                       |
|----------------|-------------------------------|------------------------------|------------------------------|------------------------------|-----------------------------|---------------------------------------------------------------------|
| Australia      | 10,175<br>(10,125-10,744)     | 10,125<br>(9630-10,620)      | 10,125<br>(9630-10,249)      | 10,125<br>(9668-10,286)      | H(3) = 2.78; $p = 0.43$     | -                                                                   |
| Canada         | 11,115<br>(11,115-11,128)     | 11,115<br>(11,115-11,165)    | 11,115<br>(11,115-11,165)    | 11,140<br>(11,115-12,489)    | H(3) = 2.88; $p = 0.41$     | -                                                                   |
| Germany        | 74,945<br>(27,190-81,850)     | 27,673<br>(25,953-75,601)    | 82 123<br>(37,251-84,610)    | 35,048<br>(31,150-76,690)    | H(3) = 10.87; $p = 0.01$    | Su vs. F: $p = 0.007$                                               |
| Poland         | 20,370<br>(19,850-21,523)     | 20,445<br>(19,010-20,990)    | 21,260<br>(21,003-21,919)    | 21,560<br>(21,211-21,968)    | H(3) = 15.13; $p < 0.01$    | Sp vs. W: $p = 0.03$ ; Su vs. F: $p = 0.03$ ; Su vs. W: $p = 0.004$ |
| United Kingdom | 26,015<br>(25,965-26,460)     | 25,965<br>(25,965-26,015)    | 25,965<br>(24,740-26,126)    | 25,965<br>(24,728-26,126)    | H(3) = 1.16; $p = 0.76$     | -                                                                   |
| United States  | 116,105 (<br>111,155-130,955) | 116,105<br>(111,155-160,655) | 113,630<br>(111,155-130,918) | 160,655<br>(116,105-165,605) | H(3) = 4.22; $p = 0.24$     | -                                                                   |



| Categories of Keywords | 1st year                     | 2nd year                     | 3rd year                     | 4th year                     | Differences between seasons | Post hoc test                                                                        |
|------------------------|------------------------------|------------------------------|------------------------------|------------------------------|-----------------------------|--------------------------------------------------------------------------------------|
| <b>Australia</b>       | 9630<br>(9630-9680)          | 10,125<br>(10,125-10,175)    | 10,150<br>(10,125-10,620)    | 10,150<br>(10,125-10,620)    | $H(3) = 17.25; p < 0.001$   | 1st vs. 2nd: $p = 0.005$ ;<br>1st vs. 3rd: $p = 0.005$ ;<br>1st vs. 4th: $p = 0.002$ |
| <b>Canada</b>          | 11,115<br>(11,115-11,165)    | 11,140<br>(11,004-12,489)    | 11,115<br>(11,115-11,165)    | 11,115<br>(11,115-11,115)    | $H(3) = 1.45; p = 0.69$     | -                                                                                    |
| <b>Germany</b>         | 55,120<br>(28,155-76,244)    | 78,385<br>(31,175-82,036)    | 37,078<br>(32,226-81,441)    | 33,613<br>(27,770-83,583)    | $H(3) = 0.96; p = 0.81$     | -                                                                                    |
| <b>Poland</b>          | 20,320<br>(19,528-21,260)    | 21,065<br>(20,458-21,523)    | 21,560<br>(20,558-22,129)    | 21,065<br>(20,854-21,485)    | $H(3) = 7.28; p = 0.06$     | -                                                                                    |
| <b>United Kingdom</b>  | 26,238<br>(25,965-26,473)    | 23,763<br>(21,015-25,965)    | 25,965<br>(25,965-25,978)    | 26,015<br>(25,965-26,460)    | $H(3) = 10.97; p = 0.01$    | 1st vs. 2nd: $p = 0.04$ ; 1st<br>vs. 3rd: $p = 0.044$                                |
| <b>United States</b>   | 118,580<br>(116,105-165,605) | 118,555<br>(111,155-160,655) | 111,155<br>(111,155-116,105) | 160,655<br>(111,155-160,655) | $H(3) = 7.61; p = 0.05$     | -                                                                                    |

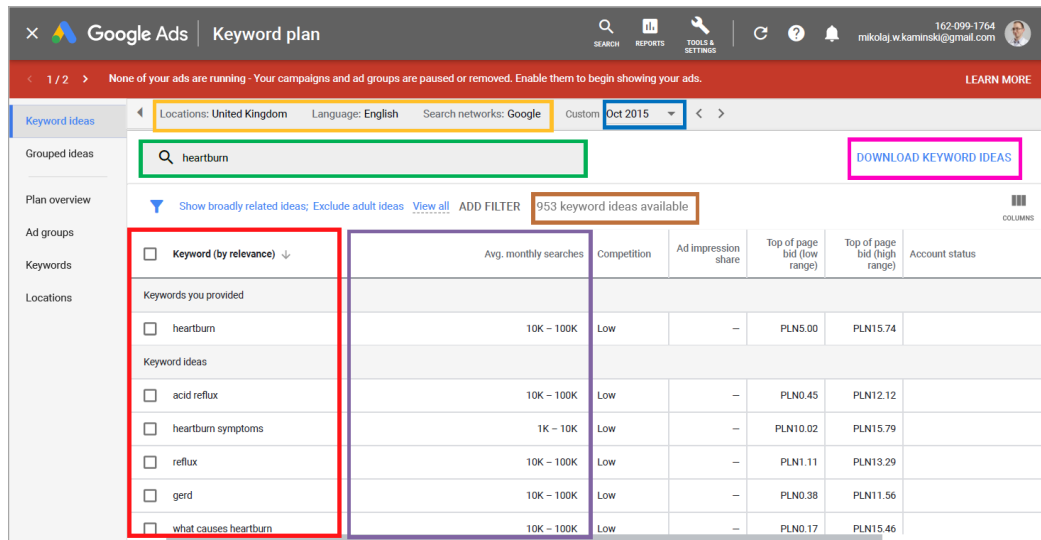

**Figure S1.** Screenshot of the keyword search engine of Google Ads Keywords Planner; The blue frame encapsulates the control for setting the time period of the search; brown frame – total number of related keywords found (“keyword ideas”); green frame – search bar for user-entered search terms; orange frame – control for setting the language and geographical region of the search, as well as the search network; pink frame – button for downloading a .csv file of the search results; red frame - long list of keywords; violet frame – monthly search volume for each keyword.

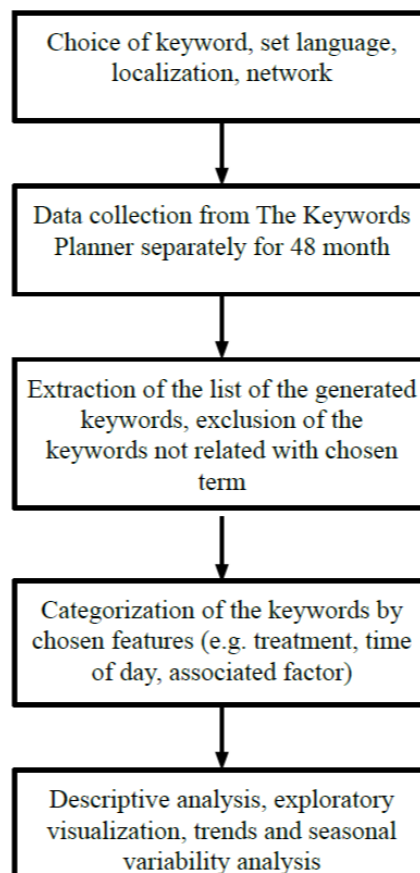

**Figure S2.** Flow chart of the data collection and manipulation workflow.
